# Supplementary material for: A novel low-cost sodium–zinc chloride battery
Source: Royal Society of Chemistry journal article supplement (doi:10.1039/c3ee24244g), 2013-01-01
Supplement: c3ee24244g.pdf [file c3ee24244g.pdf]

Cite this: DOI: 10.1039/c0xx00000x

**PAPER**

www.rsc.org/xxxxxx

---

## Supporting Information

for *Energy & Environmental Science*, DOI: 10.1039/c0xx00000x

5

### Novel Low-Cost Sodium-Zinc Chloride Battery

Xiaochuan Lu, Guosheng Li, Jin Y. Kim, \* John P. Lemmon, Vincent L. Sprenkle, and Zhenguo Yang<sup>a</sup>

10 Energy and Environment Directorate, Pacific Northwest National Laboratory, Richland, WA 99354, USA

\* Corresponding author. Tel.: +1 509 375 2225; fax: +1 509 375 2186.

*E-mail address:* Jin.Kim@pnnl.gov (Jin Y. Kim).

<sup>a</sup> Present address: UniEnergy Technologies, LLC, 4333 Harbour Pointe Blvd SW, Mukilteo, WA 98275.

15

20

25

30

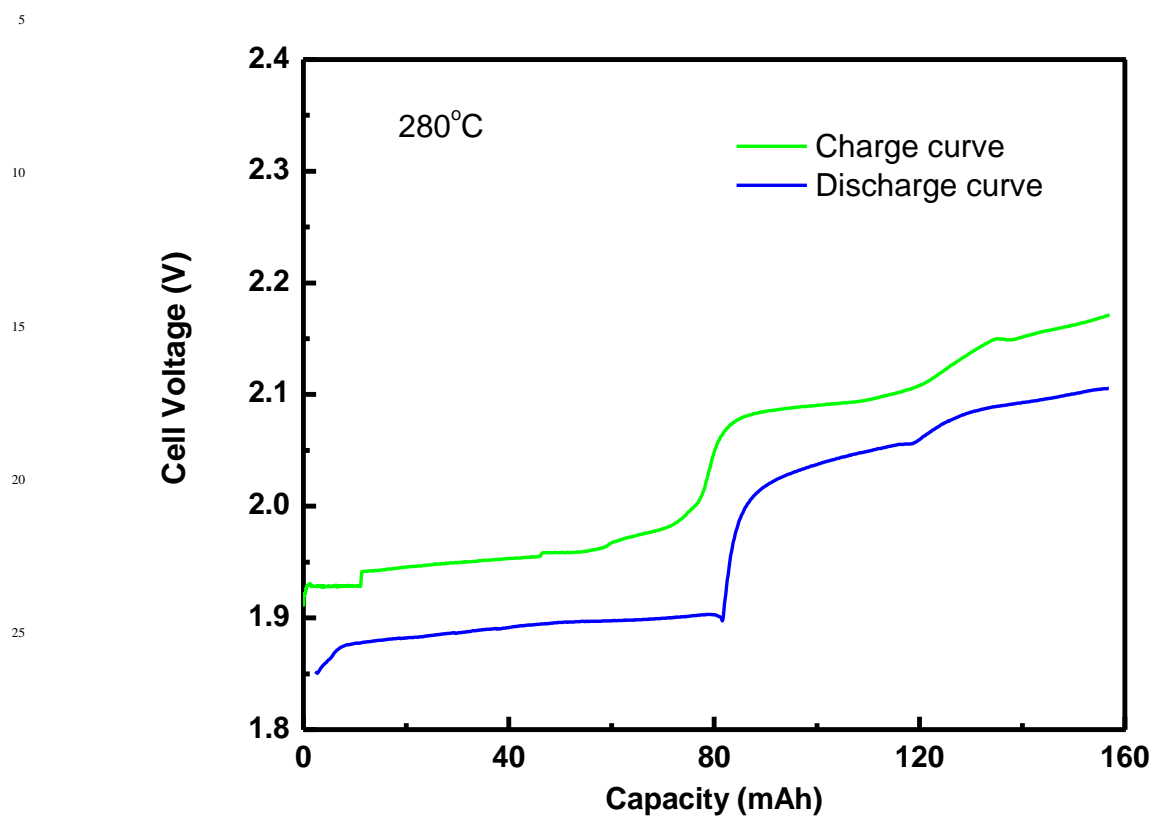

30 **Figure S1.** Initial maiden charge-discharge profiles of a Na-ZnCl<sub>2</sub> battery.

35

40

45
